# Supplementary material for: Dioscin Alleviates Cisplatin-Induced Mucositis in Rats by Modulating Gut Microbiota, Enhancing Intestinal Barrier Function and Attenuating TLR4/NF-κB Signaling Cascade
Source: Int J Mol Sci. 2022 Apr 17;23(8):4431. doi: 10.3390/ijms23084431 (PMC9025408; doi:10.3390/ijms23084431)
Supplement: Supplementary file 1 [file ijms-23-04431-s001.zip › ijms-1642340-supplementary.pdf]

## Supplementary results

Supplementary Table S1. Primer sequences and cycling conditions for real-time.

| PCR | Gene                  | Forward 5' to 3'         | Reverse 5' to 3'         |
|-----|-----------------------|--------------------------|--------------------------|
|     | MUC4                  | ATACATCAACTACATCAGCC     | CTCTGAGGAAGTGTGTTAT      |
|     | MUC2                  | GCCAGATCCCGAAACCA        | TATAGGAGTCTCGGCAGTCA     |
|     | ZO-1                  | CCCTCTGATCATTCCACACA     | TTTAGACATGCGCTCTTCCT     |
|     | Occludin              | CTCCAACGGCAAAGTGAATG     | CGGACAAGGTCAGAGGAATC     |
|     | Claudin-1             | CTGGCTTCGCTGGGATGGA      | TGGCCTGAGCAGTCACGATGTT   |
|     | IL6                   | AGGAGTGGCTAAGGACCAAGACC  | TGCCGAGTAGACCTCATAGTGACC |
|     | IL1 $\beta$           | ATCTCACAGCAGCATCTCGACAAG | CACACTAGCAGGTCGTCATCATCC |
|     | TNF $\alpha$          | GCATGATCCGAGATGTGGAAGTGG | CGCCACGAGCAGGAATGAGAAG   |
|     | IL10                  | TGCCTTCAGCAGAGTGAAG      | GGGAAGAAATCGATGACAG      |
|     | TLR4                  | AGCCGGAAGGTTATTGTGGTAGT  | TGCCGTTTCTTGTTCTTCCTCT   |
|     | NF- $\kappa$ B        | GCATTCTGACCTTGCCTATC     | ATCCTTCCCAAAGTCCACC      |
|     | I $\kappa$ B $\alpha$ | TACGCCCCAGCATCTCCACTCCG  | CTCCACGATGCCCAGGTAGCCAT  |
|     | MyD88                 | GAGCAGTGTCCCACAGACAA     | AGTAGCAGATGAAGGCGTCG     |
|     | GAPDH                 | TTCAACGGCACAGTCAAGG      | CACCAGTGGATGCAGGGA       |

Supplementary Table S2. Anosim Analysis.

| Group            | R-value | p-value |
|------------------|---------|---------|
| CDDP vs Con      | 0.574   | 0.002   |
| Dio+CDDP vs Con  | 0.463   | 0.005   |
| Dio+CDDP vs CDDP | 0.121   | 0.142   |

Note: The R-value is between (-1, 1), and the R value is greater than 0, indicating that the difference is significant. The R-value is less than 0, indicating that the difference within the group is greater than the difference, and the reliability of statistical analysis is expressed by the P-value.

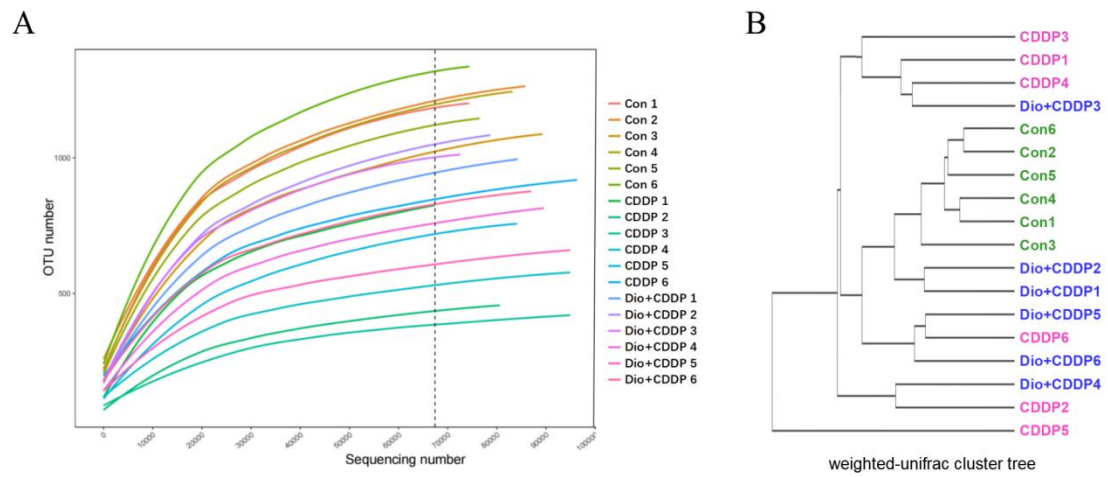

**Figure S1.** The rarefaction curves of OTU numbers (A), UPGMA clustering tree based on weighted UniFrac distance (B).

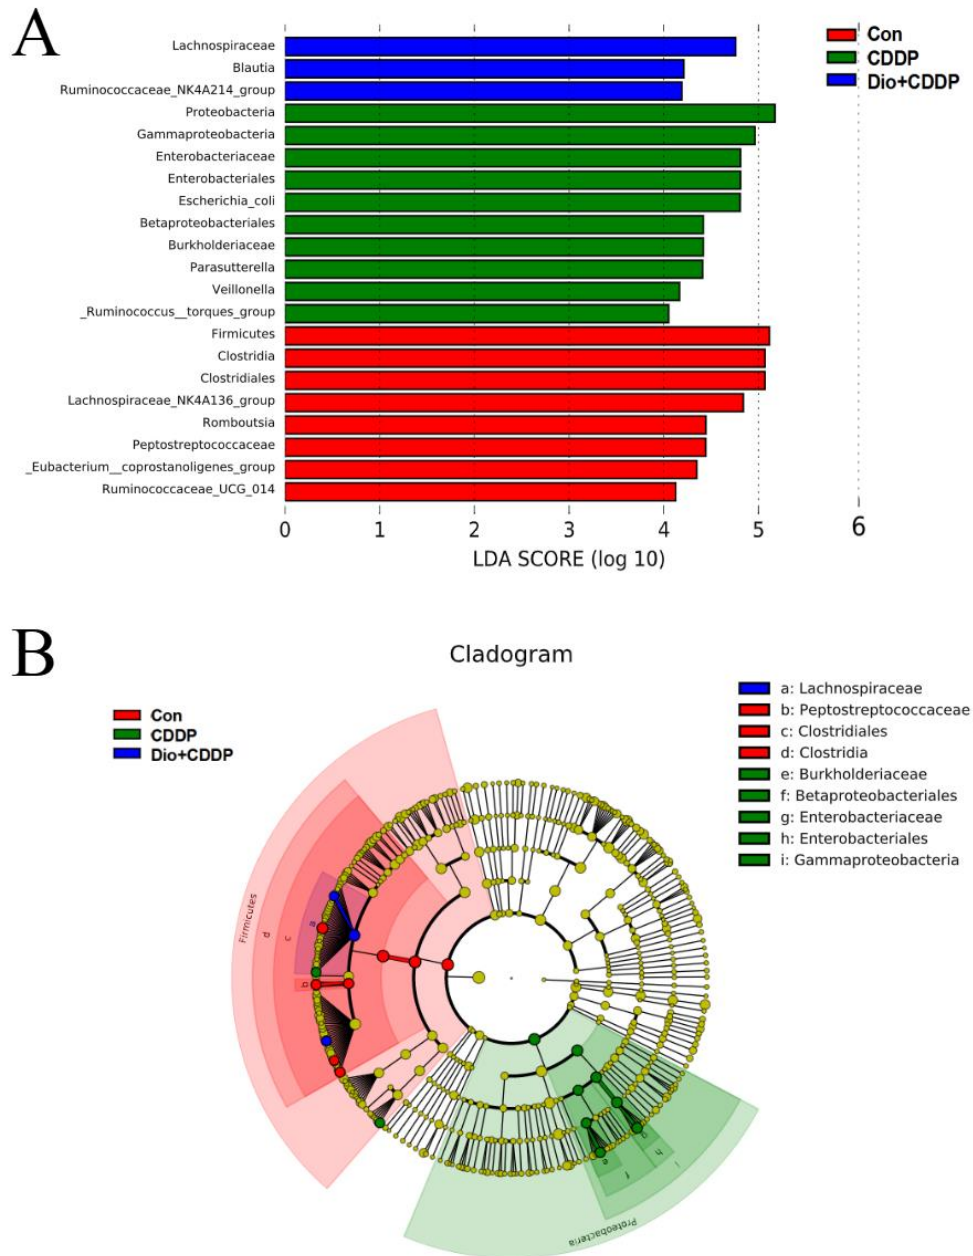

**Figure S2.** (A) Linear discriminant analysis (LDA). An LDA score higher than 4 indicated the biomarker in the corresponding group has significant difference among four groups. An LDA length (LDA score) indicated the effect degree of 21 significant species. The taxa with the largest effect sizes (LDA Score >4) are presented. (B) Cladogram (circular hierarchical tree), radial pattern of from inner to outer circular represent from phylum to genus (species) and each dot represents a bacterial taxon at same level. The one innermost dot represents the highest level of taxonomy the kingdom Bacteria, followed outwards by the lower levels, including phylum, class, order, family and genus. Each circle's diameter is proportional to the taxon's abundance. Each color represents different group.
